# Supplementary material for: Photoacoustic Microscopy Reveals Deep Angiogenic Responses in 3D Bioprinted Tumor–vessel Models
Source: Research Square preprint supplement (doi:10.21203/rs.3.rs-7588507/v1), 2025-10-16
Supplement: Supplementary file 1 [file 07a32daa08ecb5c308a631ae.docx]

Supporting Information

**Photoacoustic Microscopy Reveals Deep Angiogenic Responses in 3D Bioprinted Tumor–vessel Models**

Yongjae Jo1, #, Seokgyu Han3, 4, #, Hyunjun Kye1, Jinhee Yoo1, Junhyung Kim2, Inki Kim1, Sungsu Park1, 2, 3, *, and Byullee Park1, 2, *

#These authors contributed equally to this work

*Corresponding authors:

Byullee Park: [byullee@skku.edu](mailto:byullee@skku.edu)

Sungsu Park: [nanopark@skku.edu](mailto:nanopark@skku.edu)

1 Department of Biophysics, Institute of Quantum Biophysics, Sungkyunkwan University, Suwon 16419, Republic of Korea

2 Departments of MetaBioHealth, Biopharmaceutical Convergence, Sungkyunkwan University, Suwon 16419, Republic of Korea

3 School of Mechanical Engineering, Sungkyunkwan University, Suwon 16419, Republic of Korea

4 Division of Engineering in Medicine, Department of Medicine, Brigham and Women's Hospital, Harvard Medical School, Cambridge, MA, 02139 USA

Keywords: photoacoustic imaging, cancer spheroids, bioprinting, vascularization, drug screening


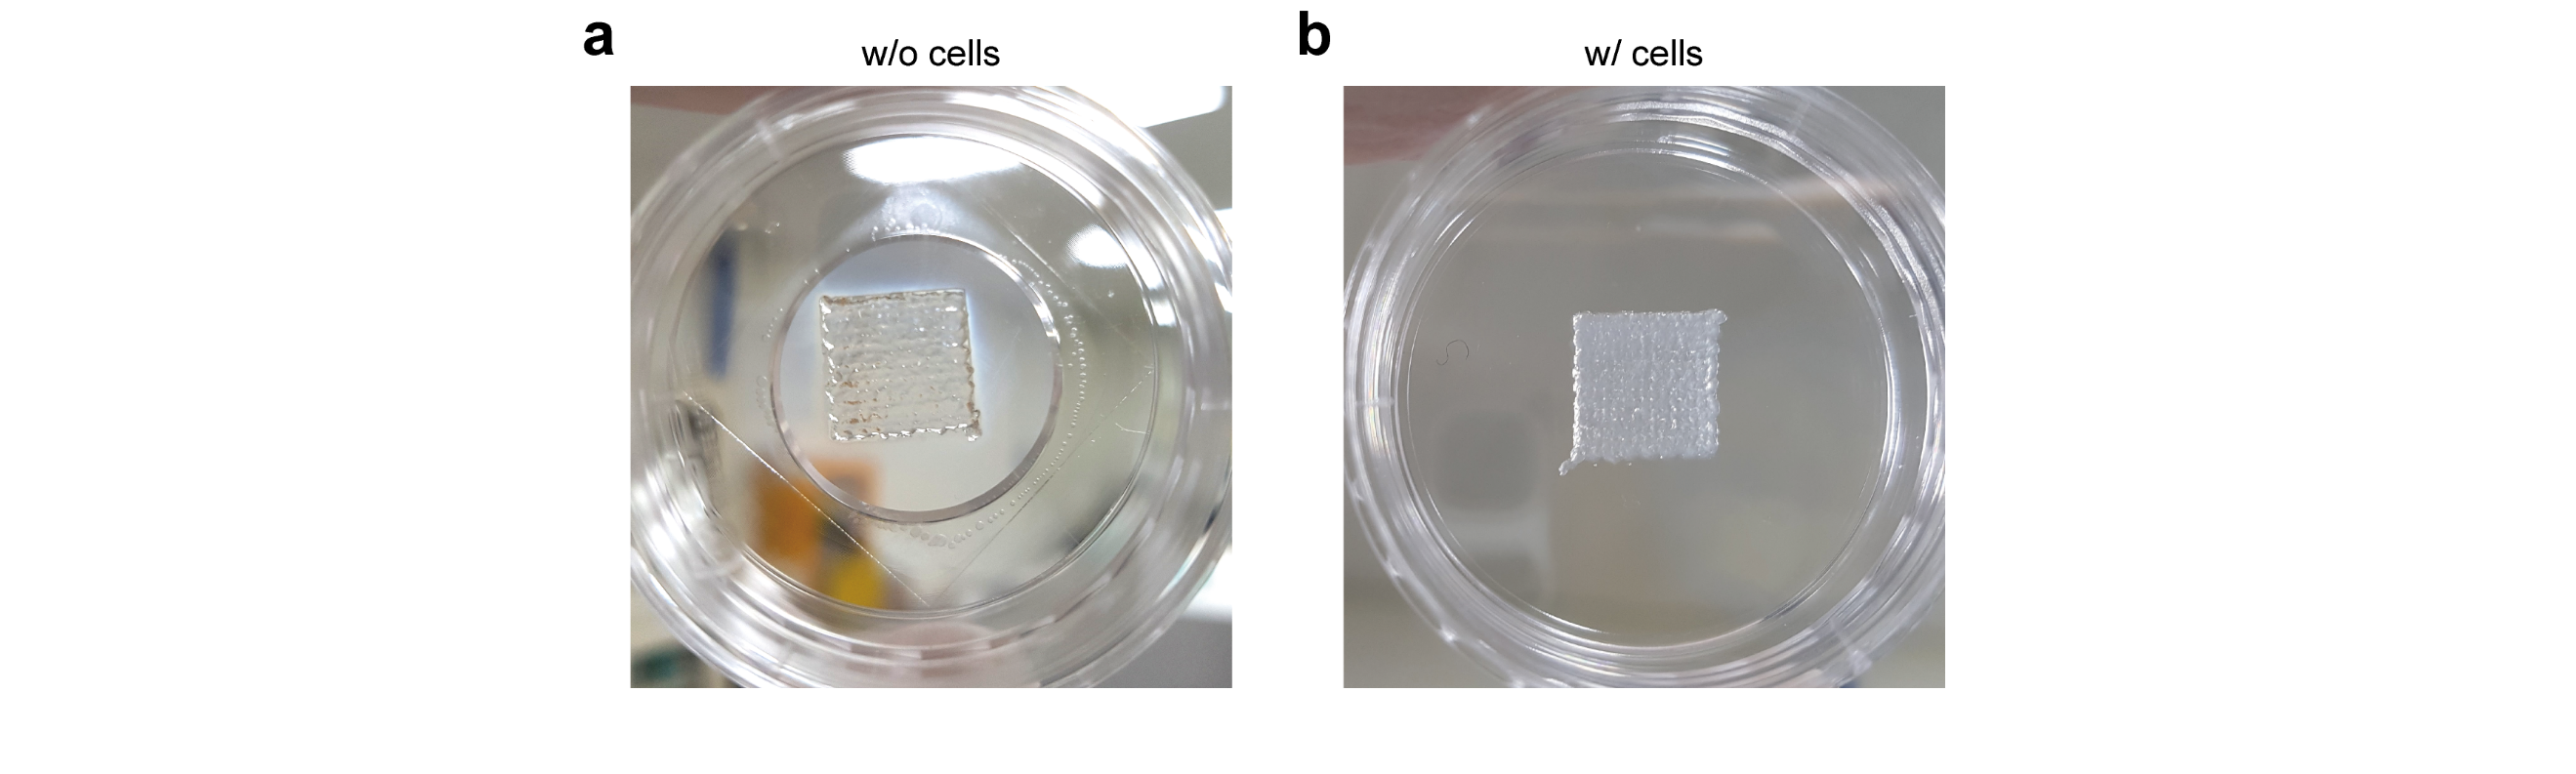


**Figure S1.** **Comparison of optical properties of bioprinted hydrogels (a, b)** Photographs of bioprinted hydrogels without (a) and with (b) embedded cells. Notably, the cell-embedded hydrogel appeared opaque, due to the refractive index mismatch between the hydrogel and the cells, whereas the hydrogel without embedded cells remained transparent.


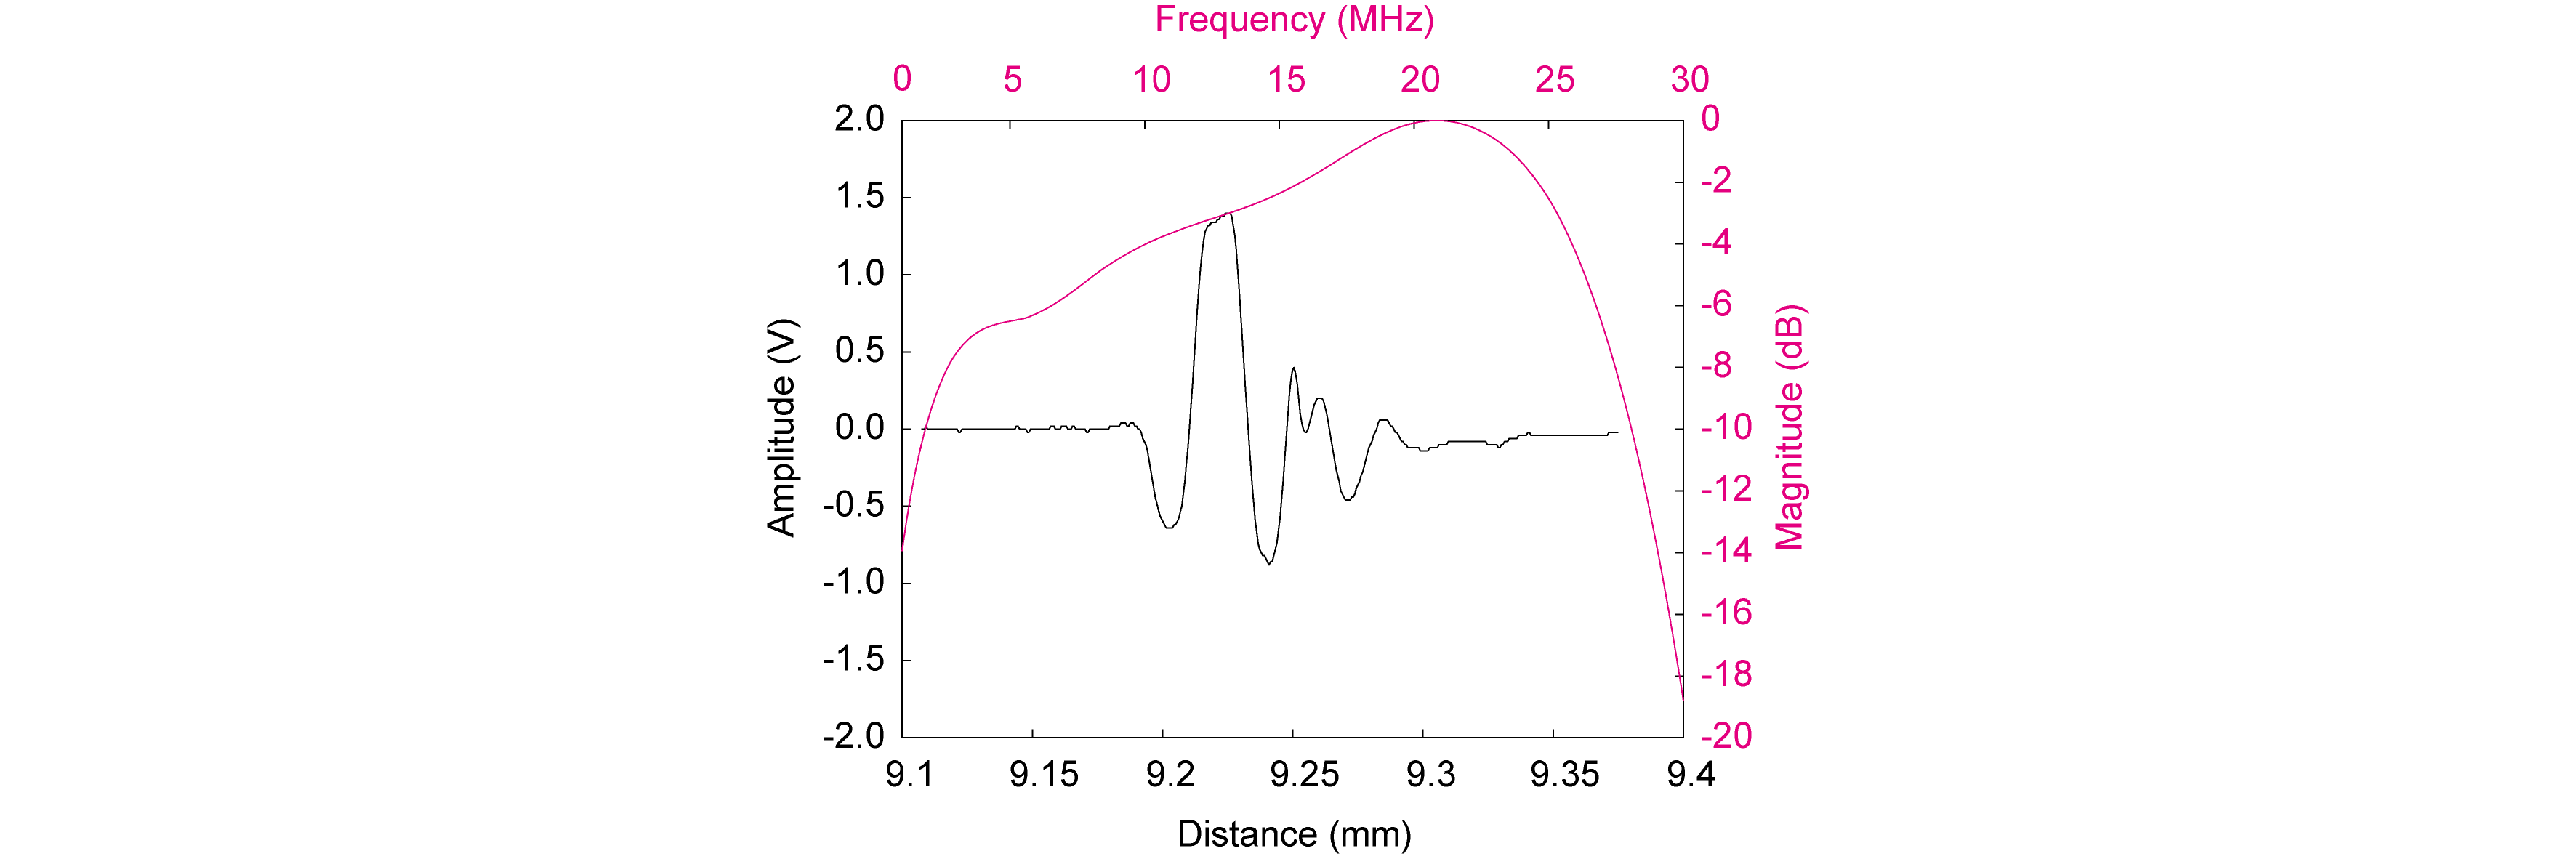


**Figure S2.** **Pulse–echo response of the ultrasound transducer in the PAM system.** Time–domain (black) and frequency–domain (magenta) representations of the pulse–echo response. The transducer exhibited a center frequency of ~19 MHz, and a bandwidth of ~69%.


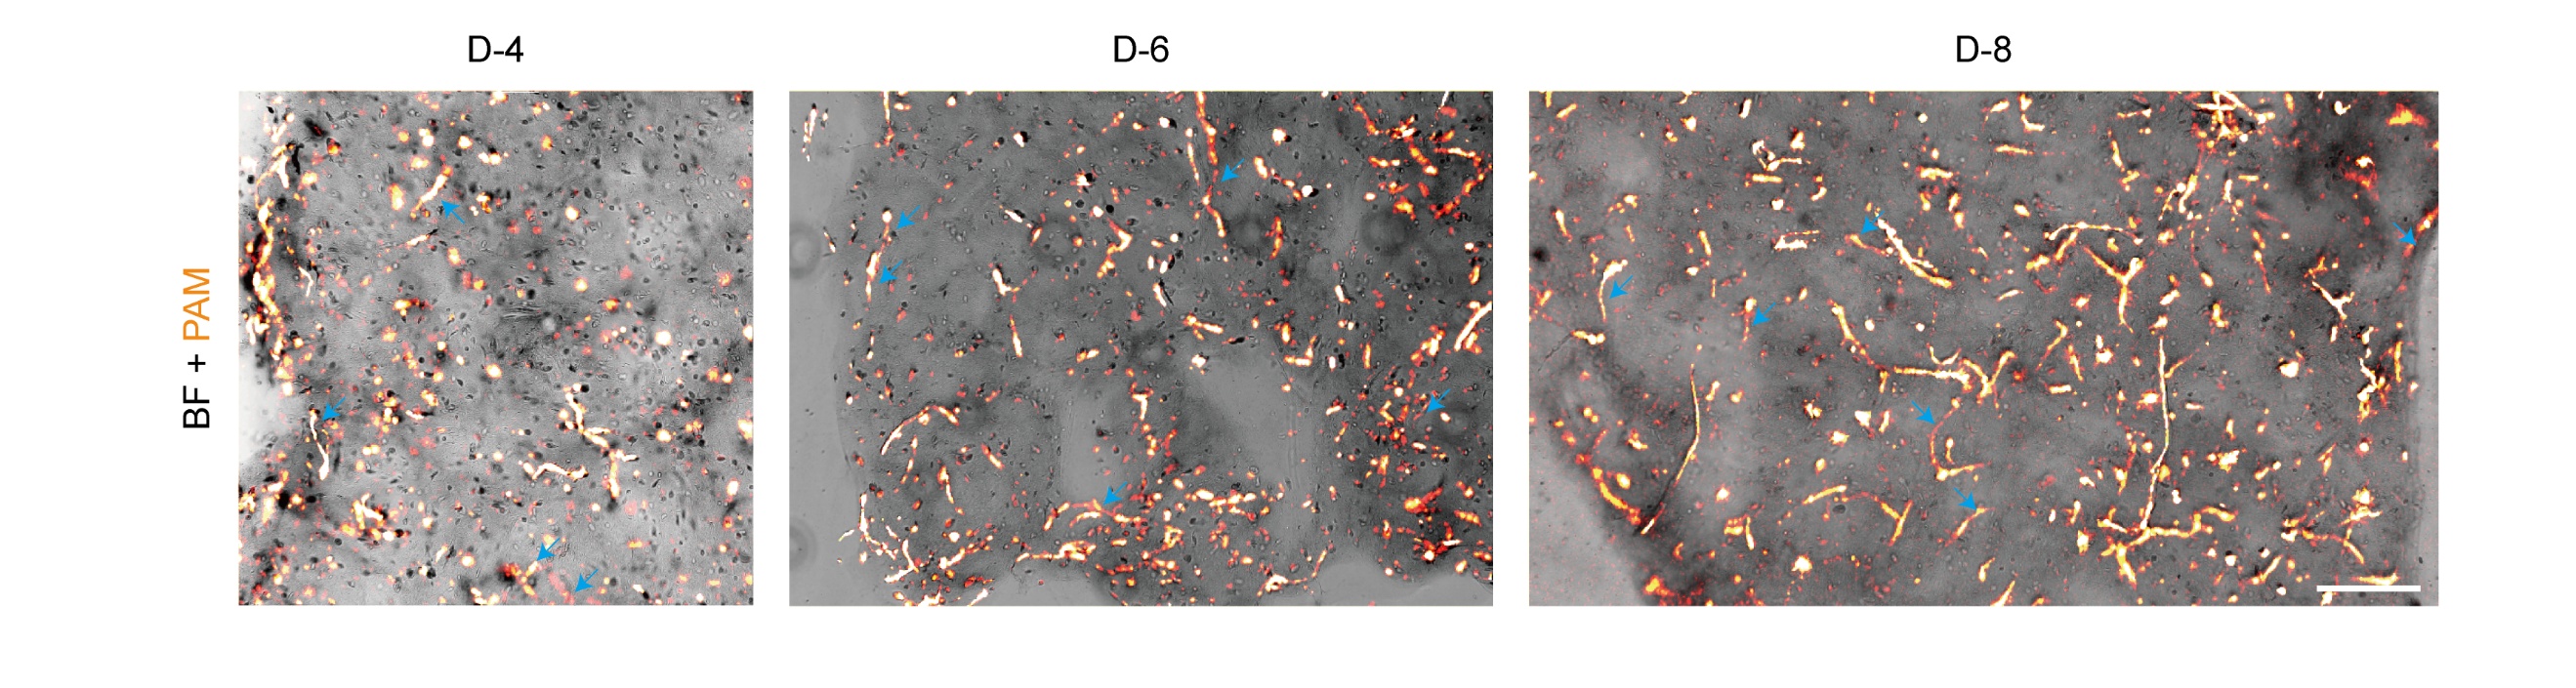


**Figure S3.** **Merged BF and PAM images of vascular networks.** Correlative images of BF (gray lookup table, LUT) and PAM (hot LUT) for hydrogels cultured for 4, 6, and 8 days, comparing the visibility of vascular structures between imaging modalities. Blue arrows indicate vascular structures that are clearly identified in PA images, but appear ambiguous in BF images. Scale bar: 400 µm.


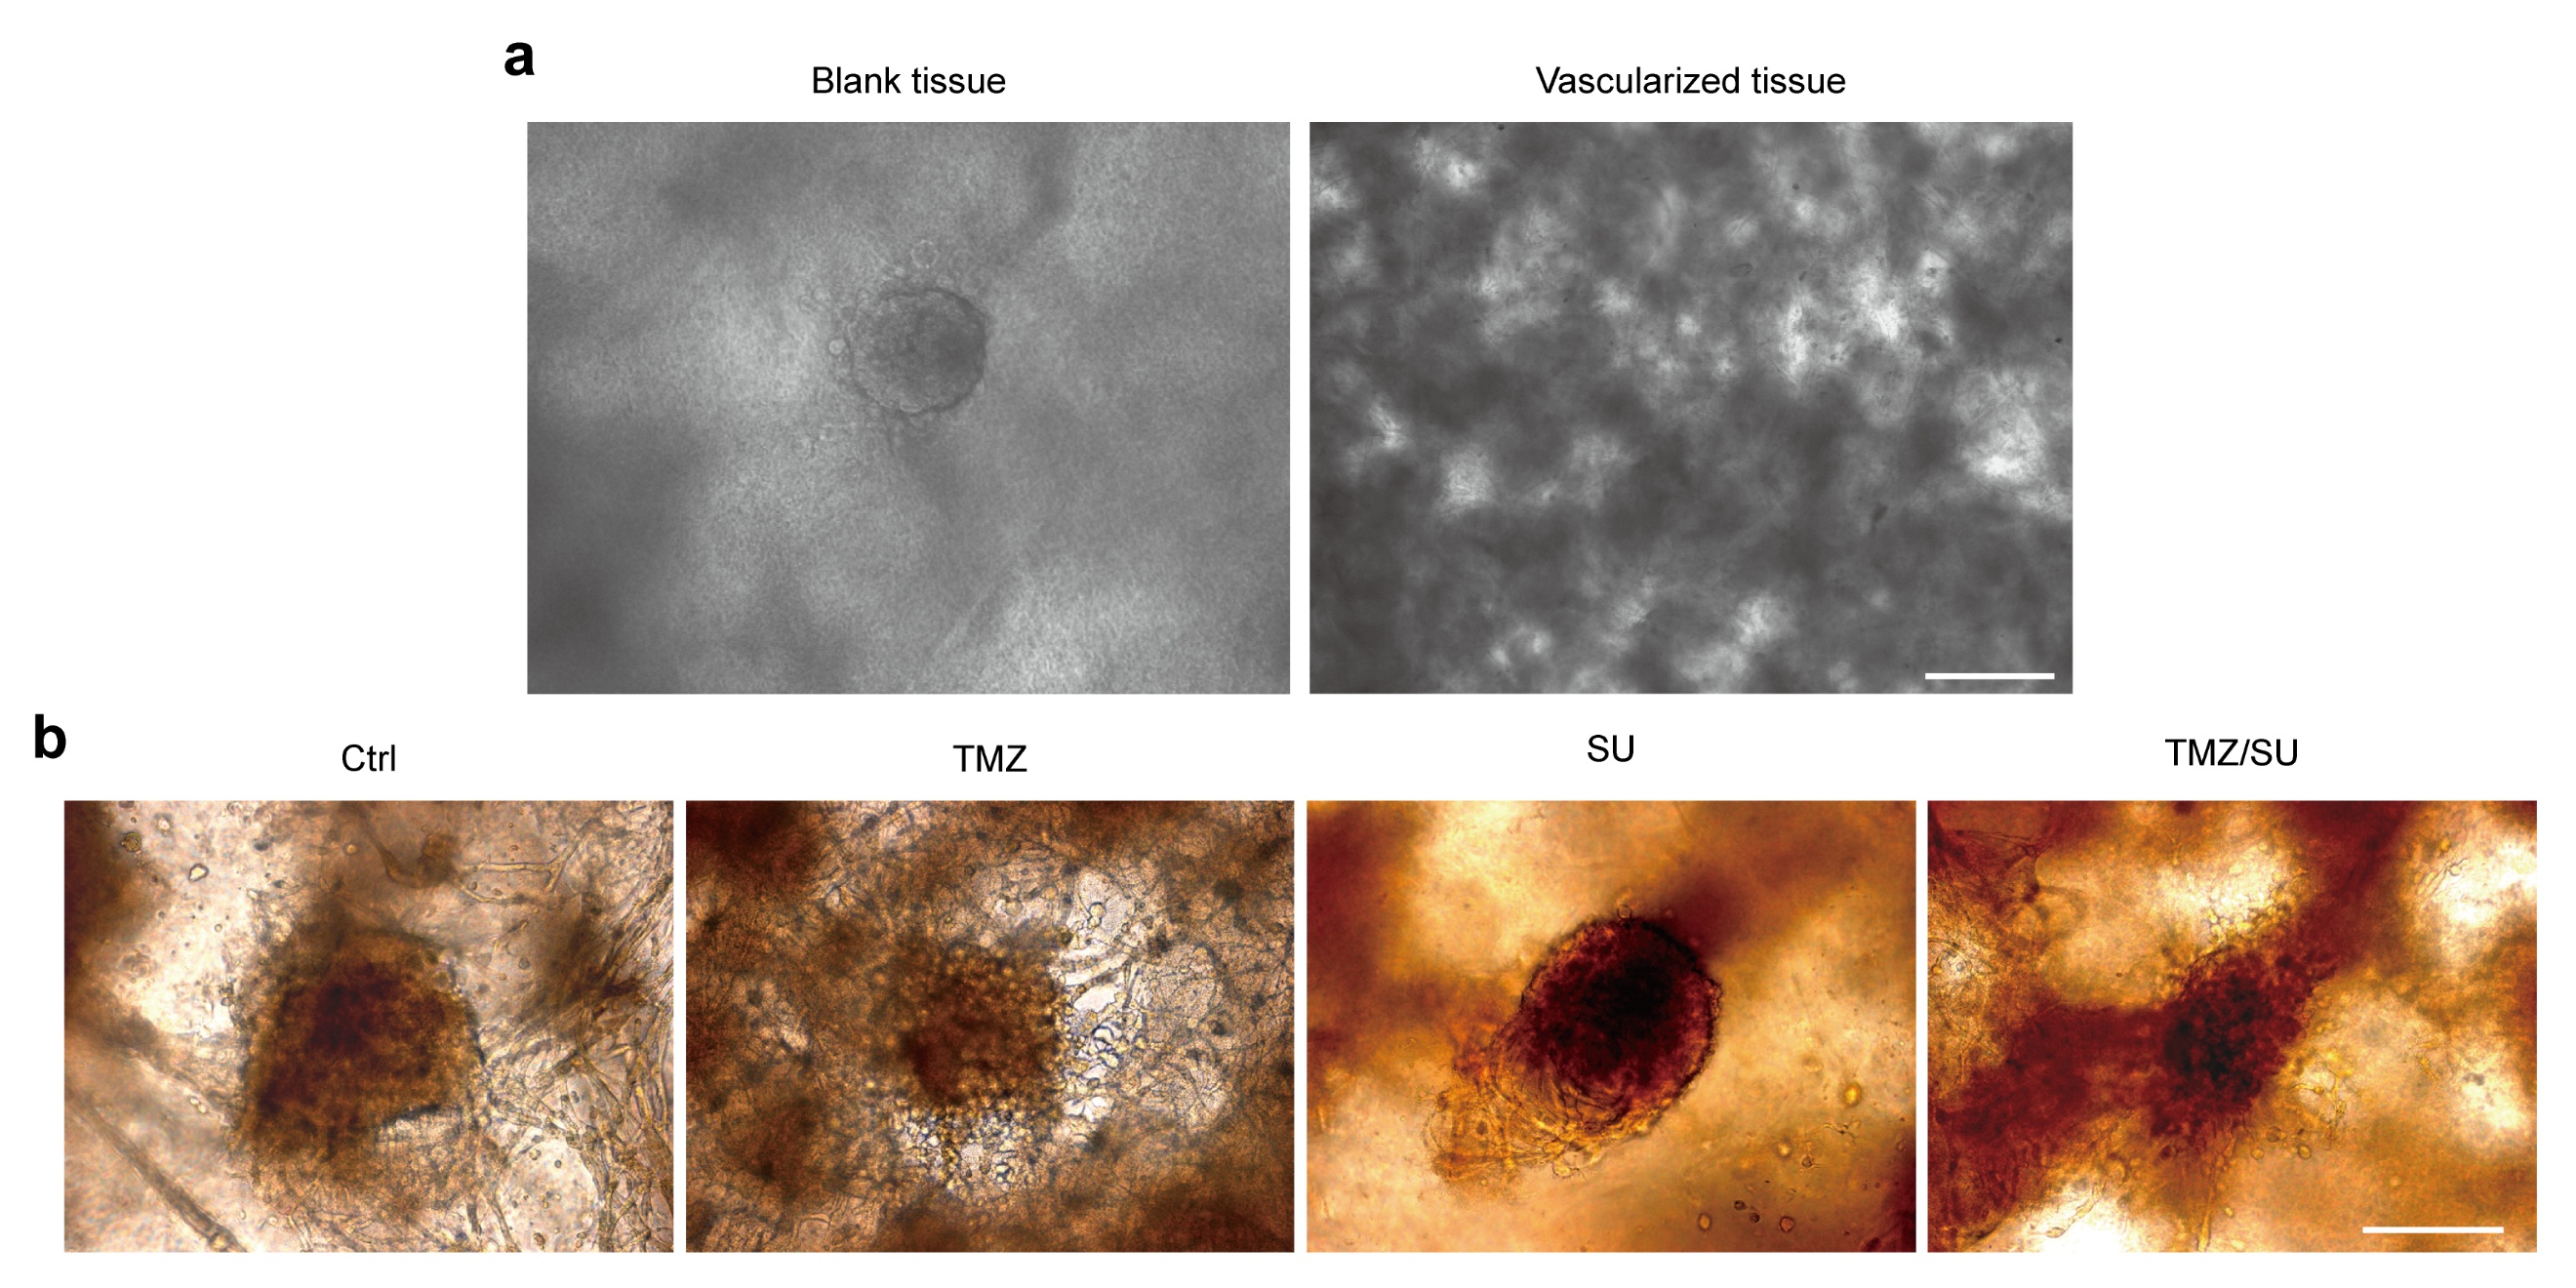


**Figure S4.** **U87 spheroid seeded on vascularized tissue.** **(a)** Bright-field images showing U87 spheroid seeded onto the blank (only gelatin, alginate, and fibrinogen) and vascuralized (HUVEC/LF in gelatin, alginate, and fibrinogen) tissues. **(b)** Representative images of U87 spheroids seeded onto vascularized tissues treated without, or with, TMZ, SU, and TMZ/SU combination on day 3 after seeding. Scale bars: 200 µm.


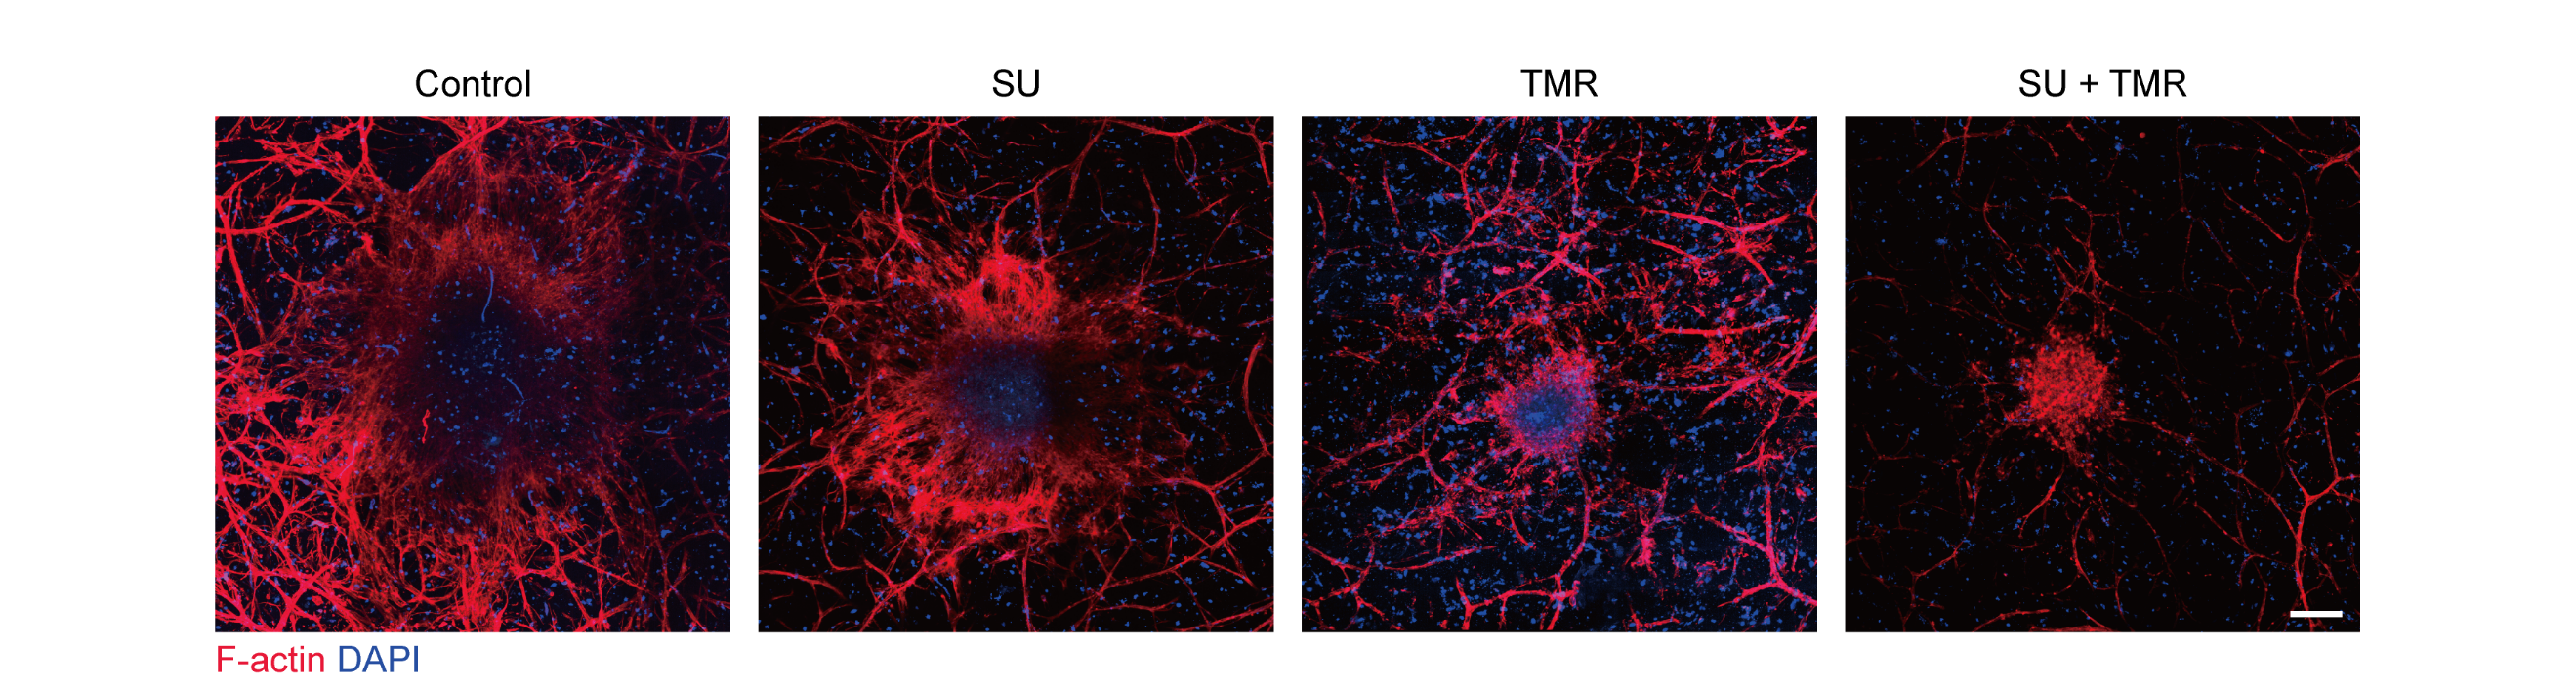


**Figure S5.** **Fluorescence images of vascular networks in tumor-seeded hydrogels under various drug treatments.** Vascular structures were stained with Phalloidin (F–actin) and DAPI (nuclei). Scale bar: 200 µm.


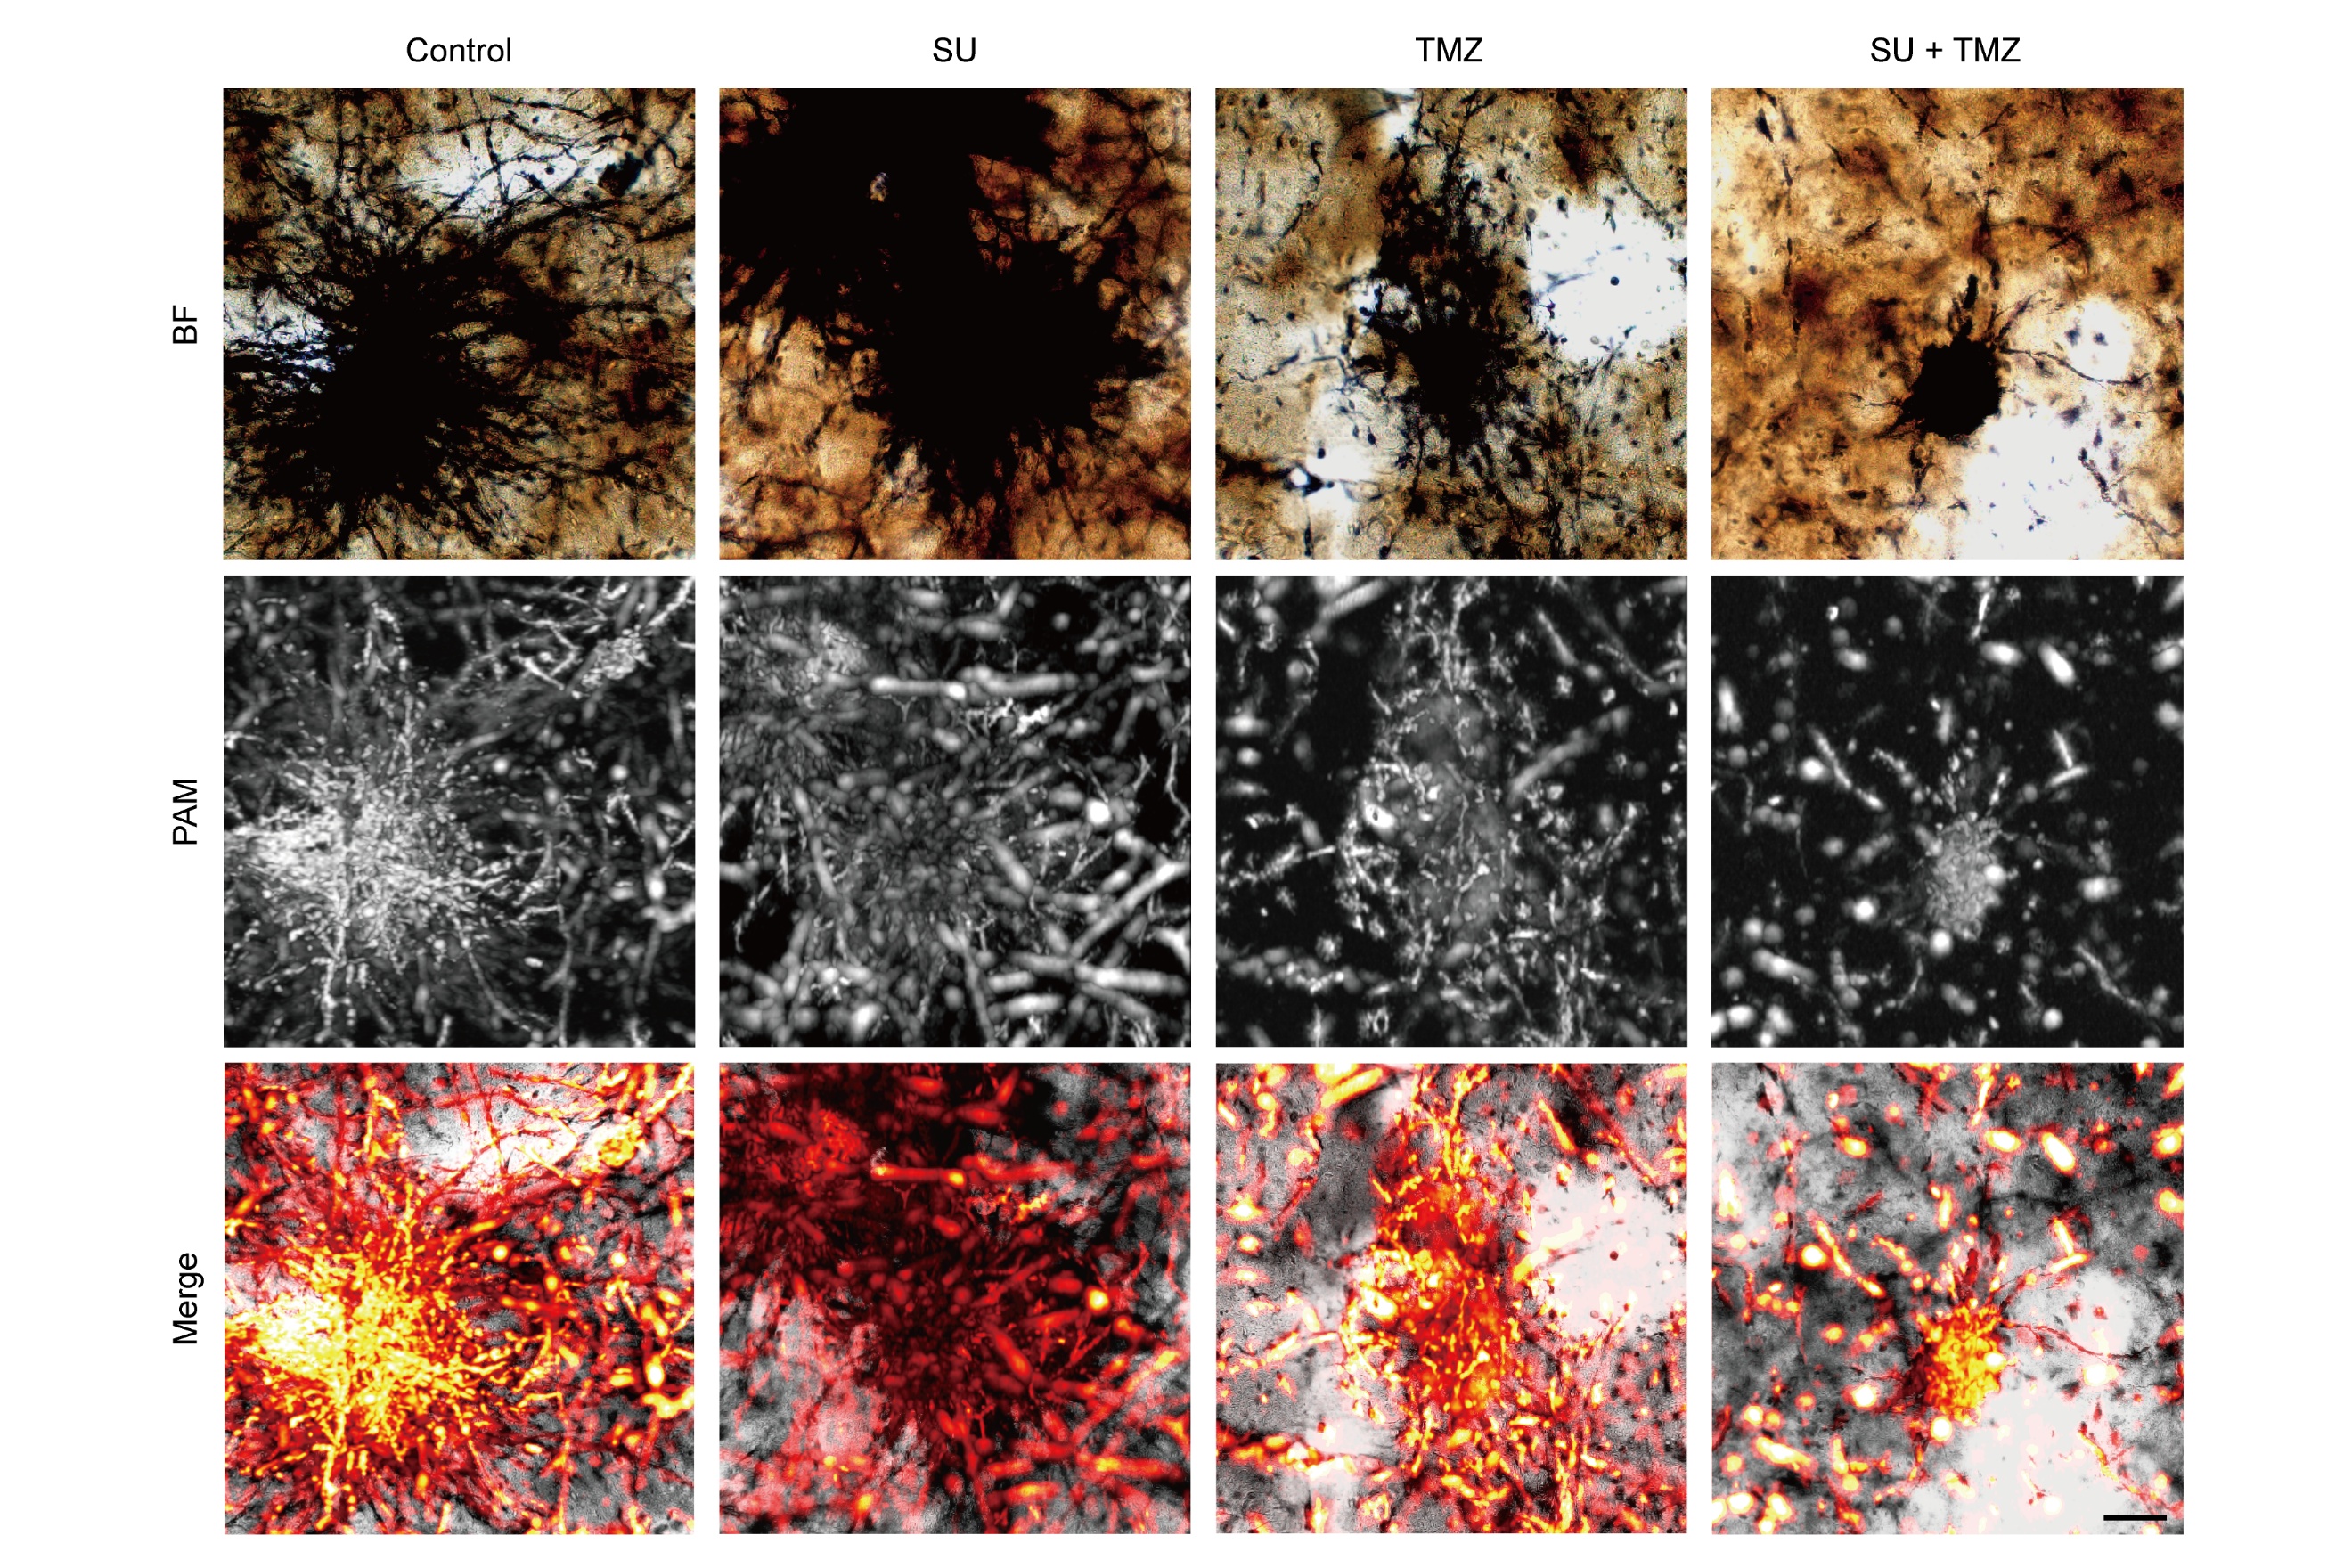


**Figure S6.** **Merged BF and PAM images of vascular networks in tumor-seeded hydrogels under various drug treatments.** BF, MAP of PAM images, and their merged views for the control group and drug-treated groups, including SU, TMZ, and their combination. Scale bar: 200 µm.


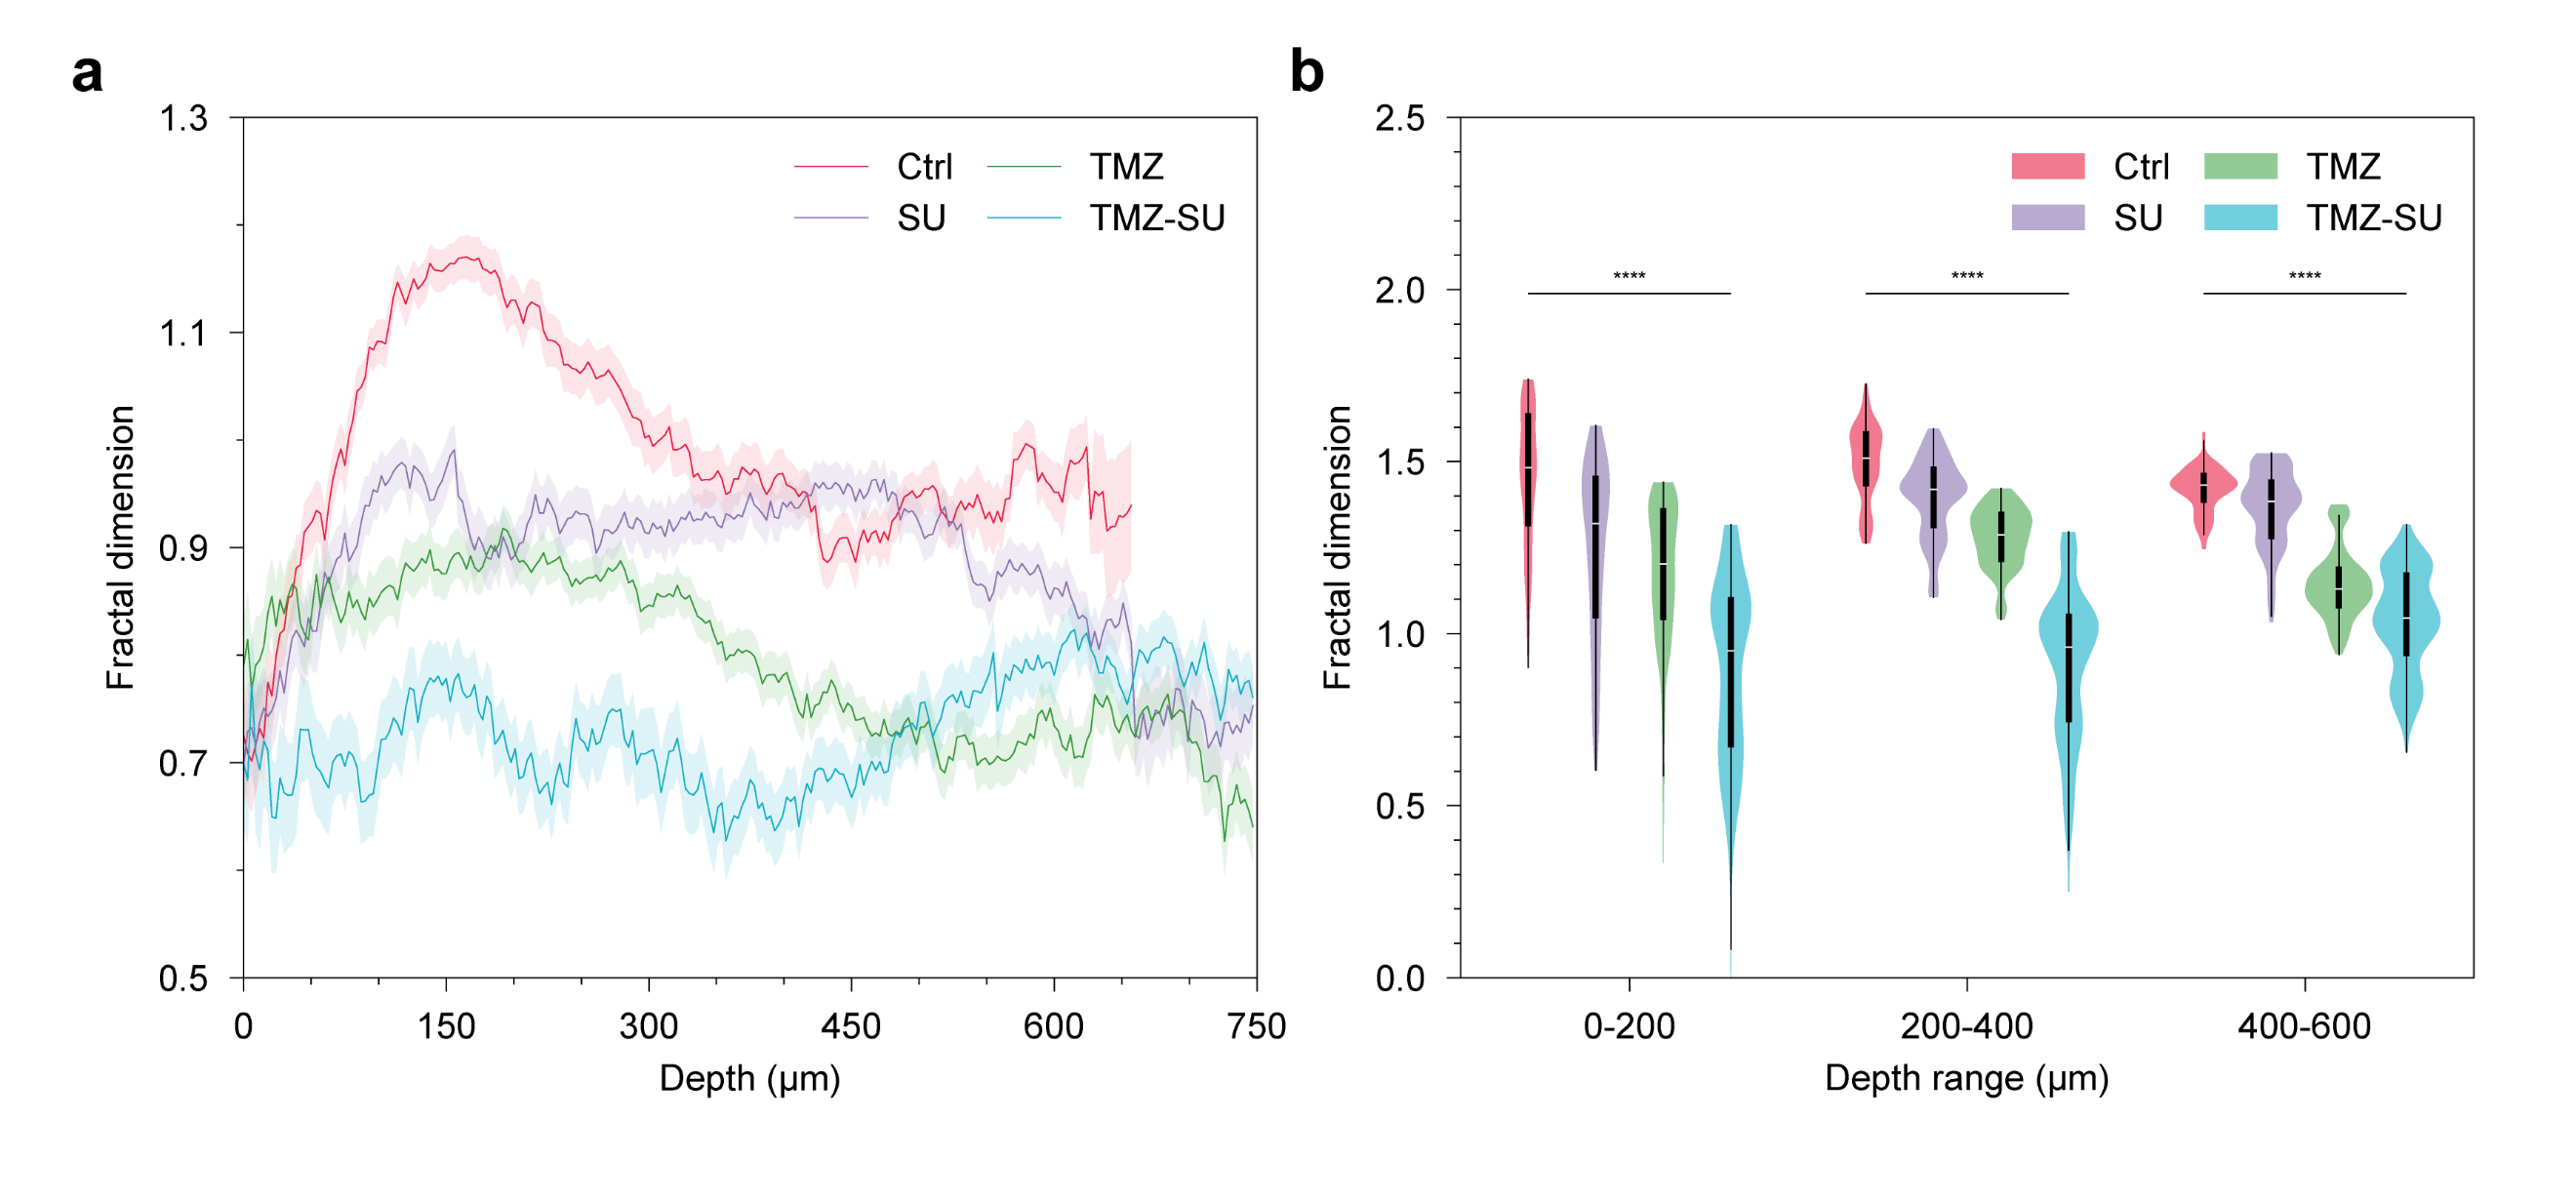


**Figure S7. 3D quantification of vascular network complexity**. **(a, b)** Depth profile (a) and statistical analysis (b) of fractal dimension-based vessel complexity under various drug treatment conditions. As normality was not satisfied in all groups, the Kruskal–Wallis non-parametric test was used, followed by Dunn’s post hoc test with Bonferroni correction for multiple comparisons. *****p* < 0.0001; ****p* < 0.001; ***p* < 0.01; **p* < 0.05; ns, non-significance.
